# Supplementary material
Source: PubMed Central journal article supplement (PMC2245840)
Supplement: plntphys_pp.107.108431_1.pdf [file plntphys_pp.107.108431_1.pdf]

## SUPPLEMENTAL TABLE LEGEND

Data tables containing relative quantitative values for all detected components, including both identified and unidentified components.
